# Supplementary material for: Improvement of Damage in Human Dermal Fibroblasts by 3,5,7-Trimethoxyflavone from Black Ginger (Kaempferia parviflora)
Source: MDPI journal article supplement (doi:10.3390/antiox11020425), 2022-02-19
Supplement: s1 [file s1]

## Supplementary Materials

# Improvement of Damage in Human Dermal Fibroblasts by 3,5,7-Trimethoxyflavone from Black Ginger (*Kaempferia parviflora*)

Sullim Lee<sup>1</sup>, Taesu Jang<sup>2</sup>, Ki Hyun Kim<sup>3,\*</sup> and Ki Sung Kang<sup>4,\*</sup>

<sup>1</sup> Department of Life Science, College of Bio-Nano Technology, Gachon University, Seongnam 13120, Korea; sullimlee@gachon.ac.kr (S.L.)

<sup>2</sup> College of Medicine, Dankook University, Cheonan 31116, Korea; jangts@dankook.ac.kr (T.J.)

<sup>3</sup> School of Pharmacy, Sungkyunkwan University, Suwon 16419, Korea; khkim83@skku.edu (K.H.K.)

<sup>4</sup> College of Korean Medicine, Gachon University, Seongnam 13120, Korea; kkang@gachon.ac.kr (K.S.K.)

\* Correspondence: Tel.: 82-31-290-7700; E-mail: khkim83@skku.edu (K.H.K.); Tel.: 82-31-750-5402; Fax: 82-31-750-5416; E-mail: kkang@gachon.ac.kr (K.S.K.)

**Figure S1** : <sup>1</sup>H-NMR spectrum of compound **1** (in CDCl<sub>3</sub>)

**Figure S2** : <sup>1</sup>H-NMR spectrum of compound **2** (in CDCl<sub>3</sub>)

**Figure S3** : <sup>1</sup>H-NMR spectrum of compound **3** (in CDCl<sub>3</sub>)

**Figure S4** : <sup>1</sup>H-NMR spectrum of compound **4** (in CDCl<sub>3</sub>)

**Figure S5** : <sup>1</sup>H-NMR spectrum of compound **5** (in CDCl<sub>3</sub>)

**Figure S6** : <sup>1</sup>H-NMR spectrum of compound **6** (in CDCl<sub>3</sub>)

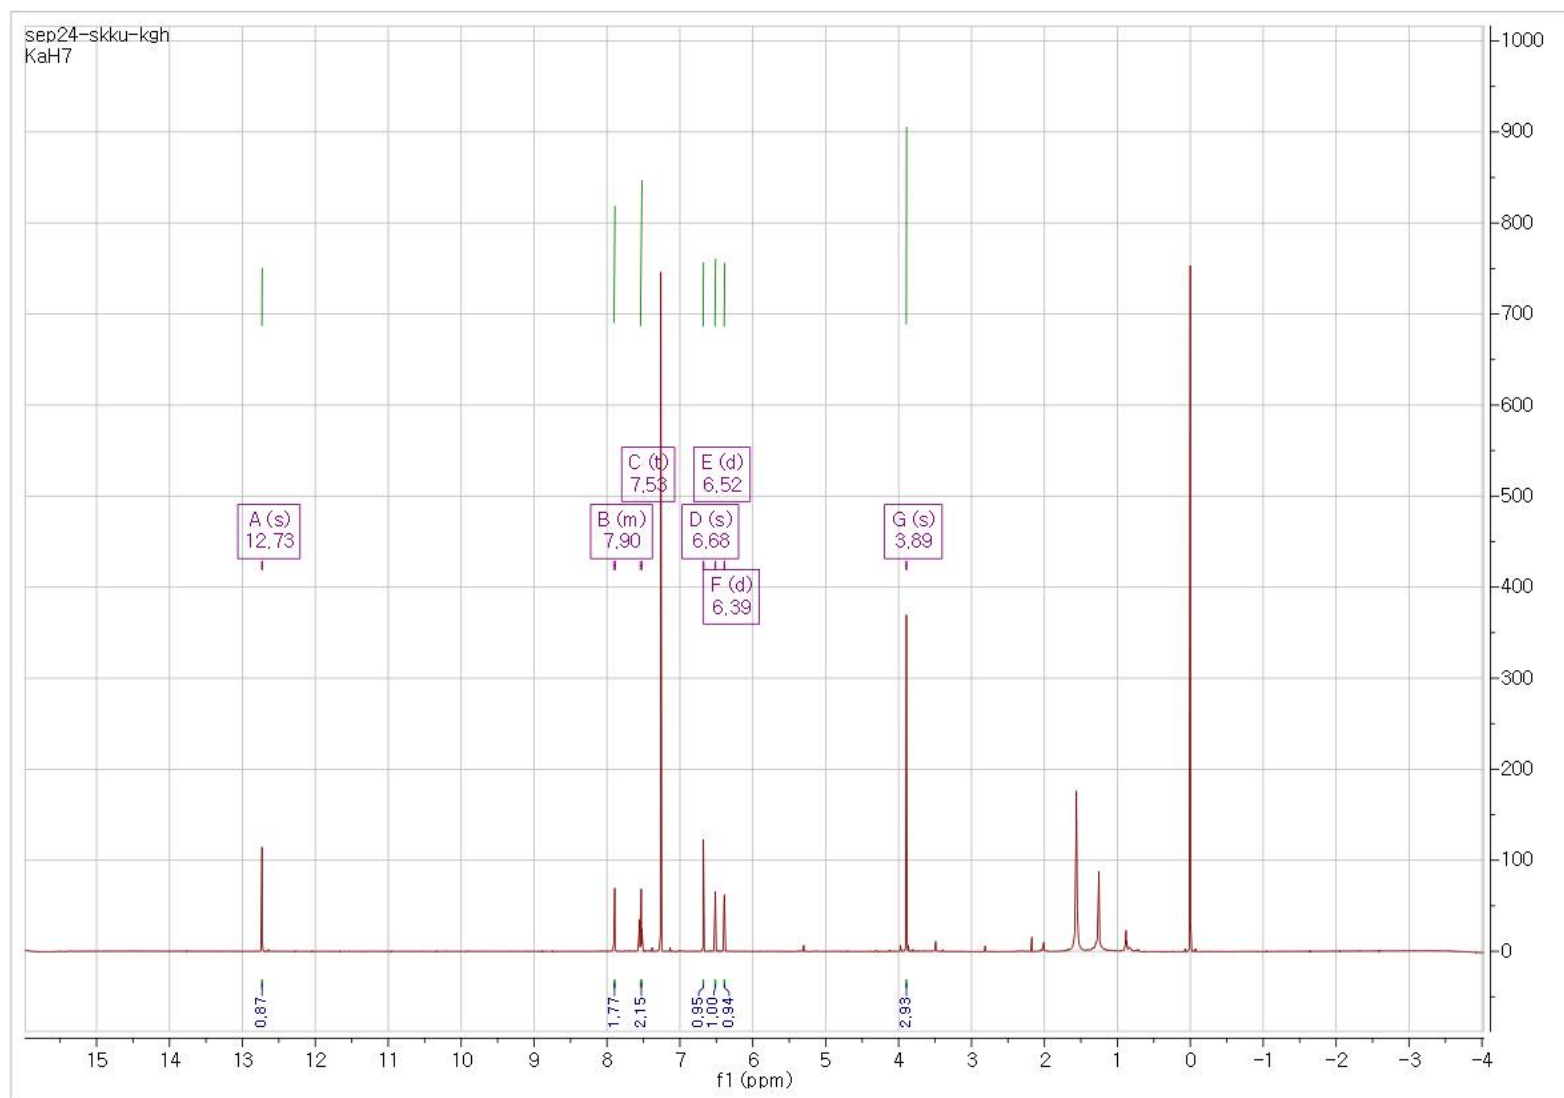

**Figure S1** :  $^1\text{H}$ -NMR spectrum of compound **1** (in  $\text{CDCl}_3$ )

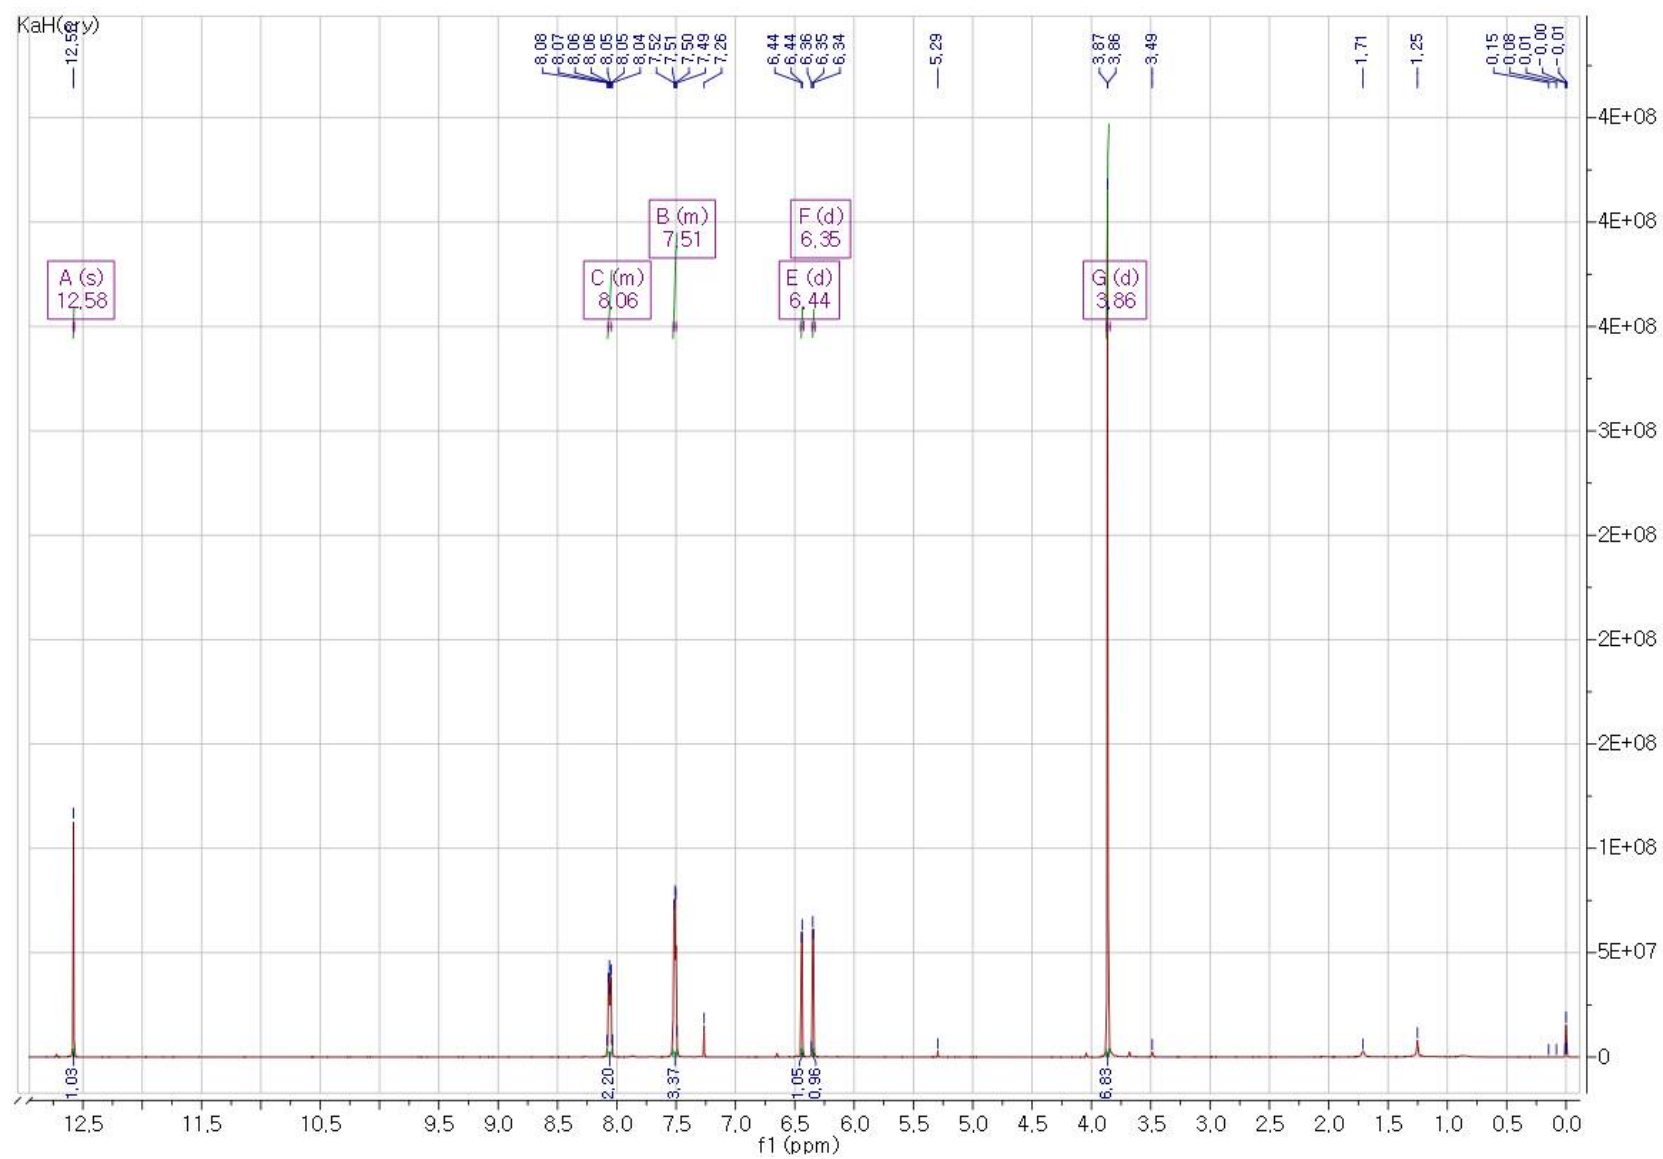

**Figure S2 :** <sup>1</sup>H-NMR spectrum of compound 2 (in CDCl<sub>3</sub>)

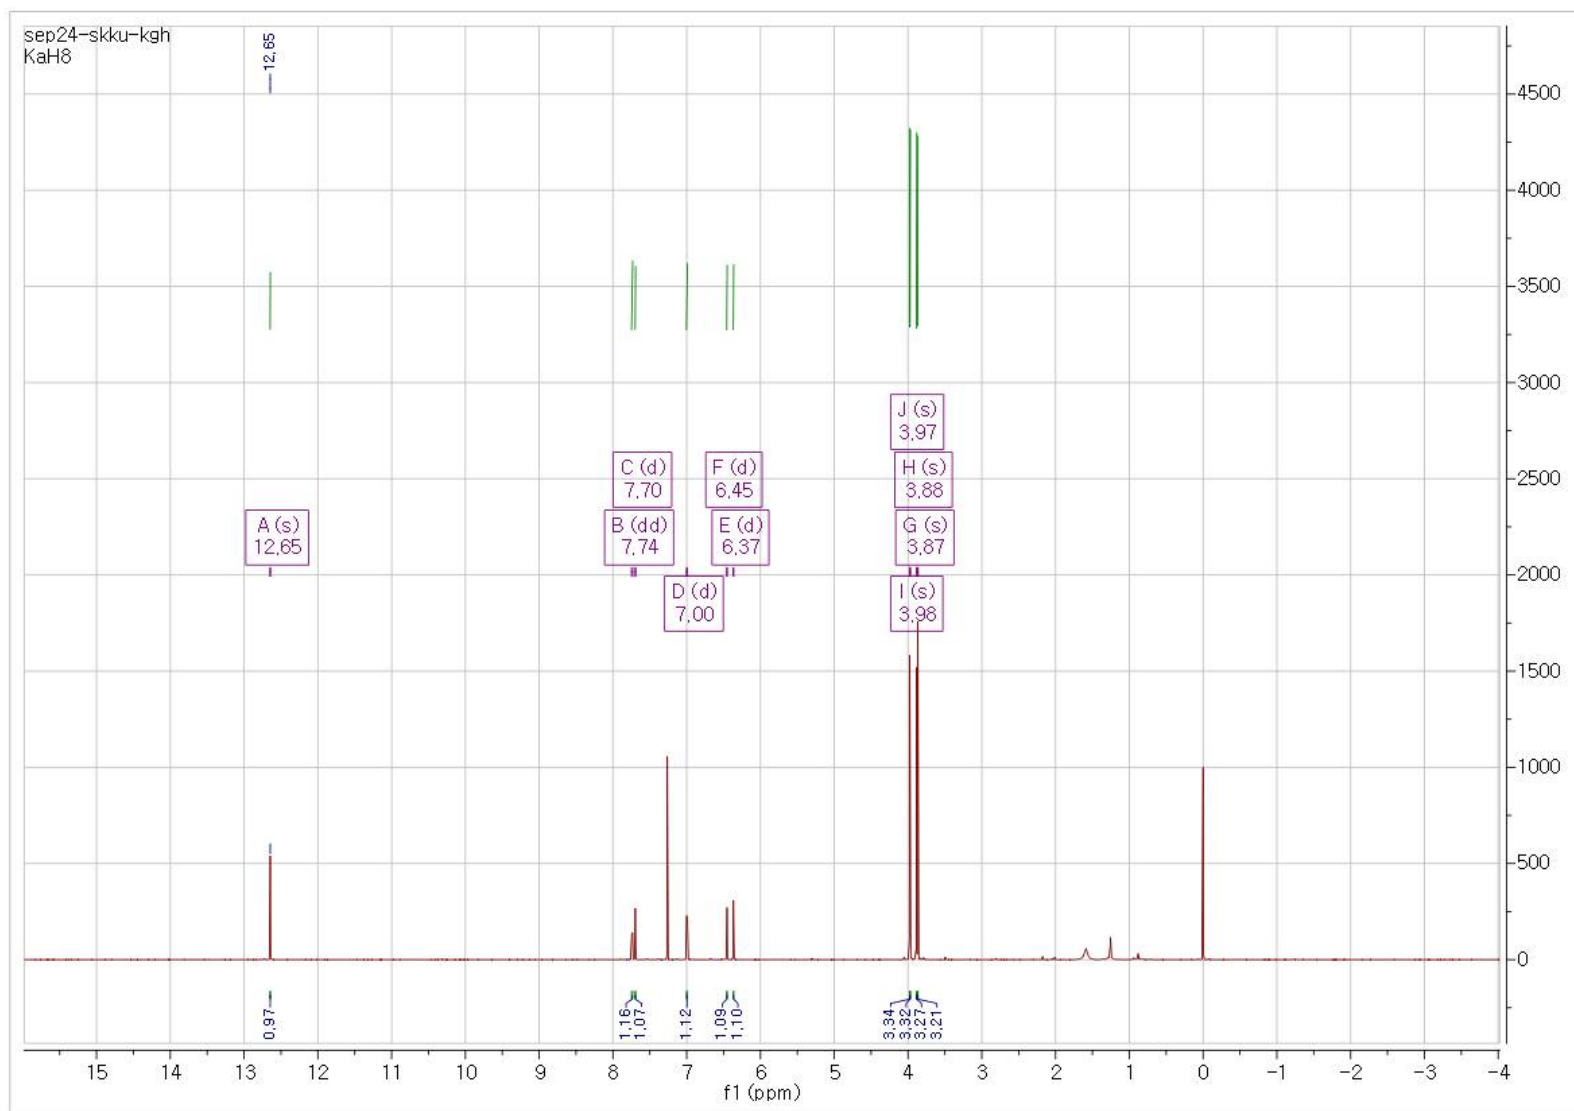

**Figure S3** :  $^1\text{H}$ -NMR spectrum of compound **3** (in  $\text{CDCl}_3$ )

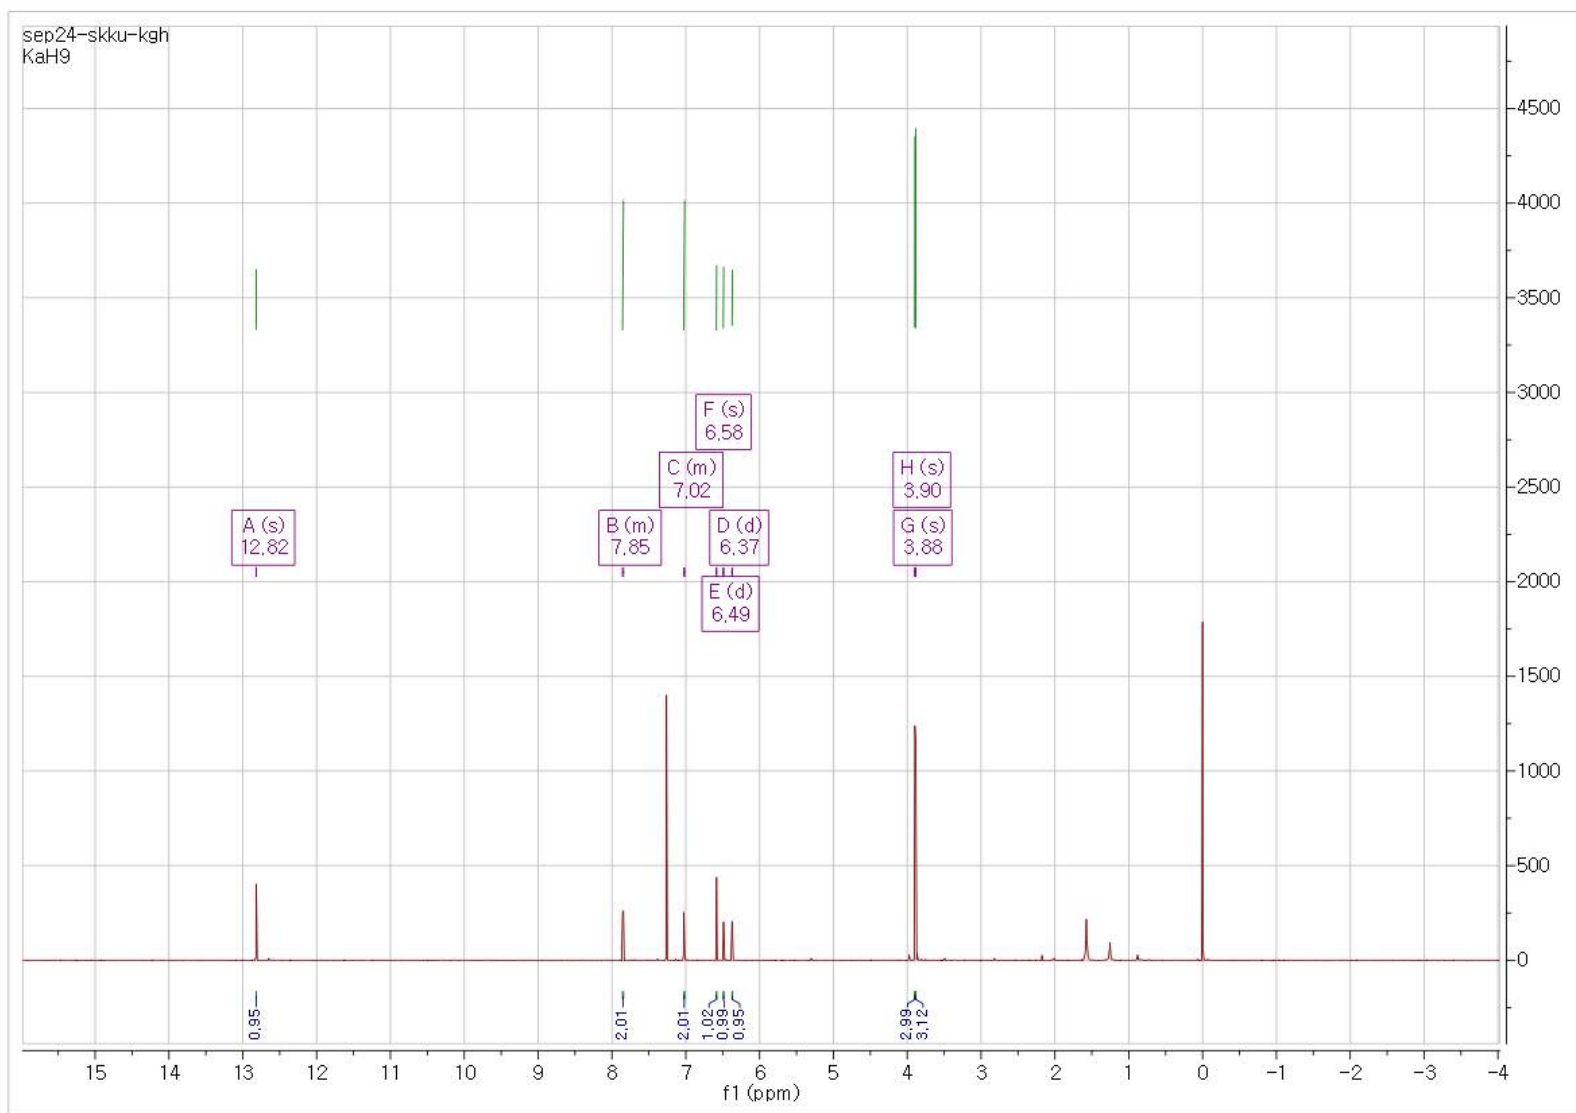

**Figure S4** :  $^1\text{H}$ -NMR spectrum of compound **4** (in  $\text{CDCl}_3$ )

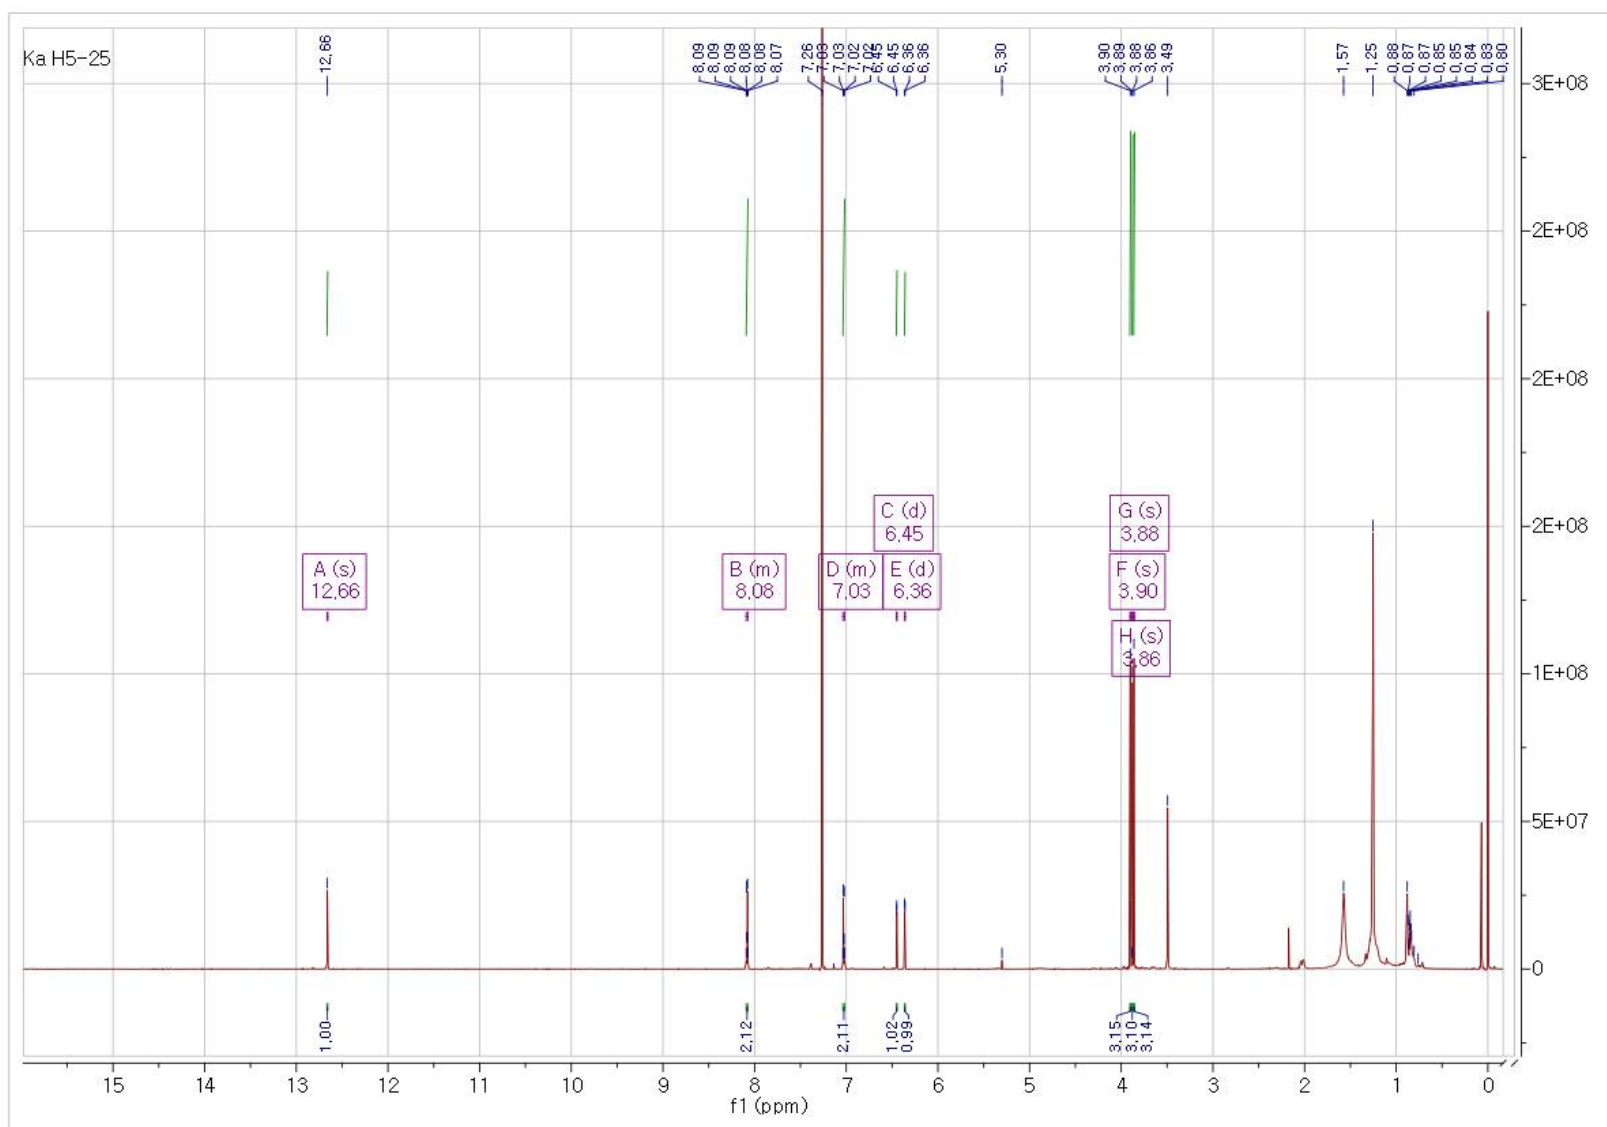

**Figure S5 :**  $^1\text{H}$ -NMR spectrum of compound **5** (in  $\text{CDCl}_3$ )

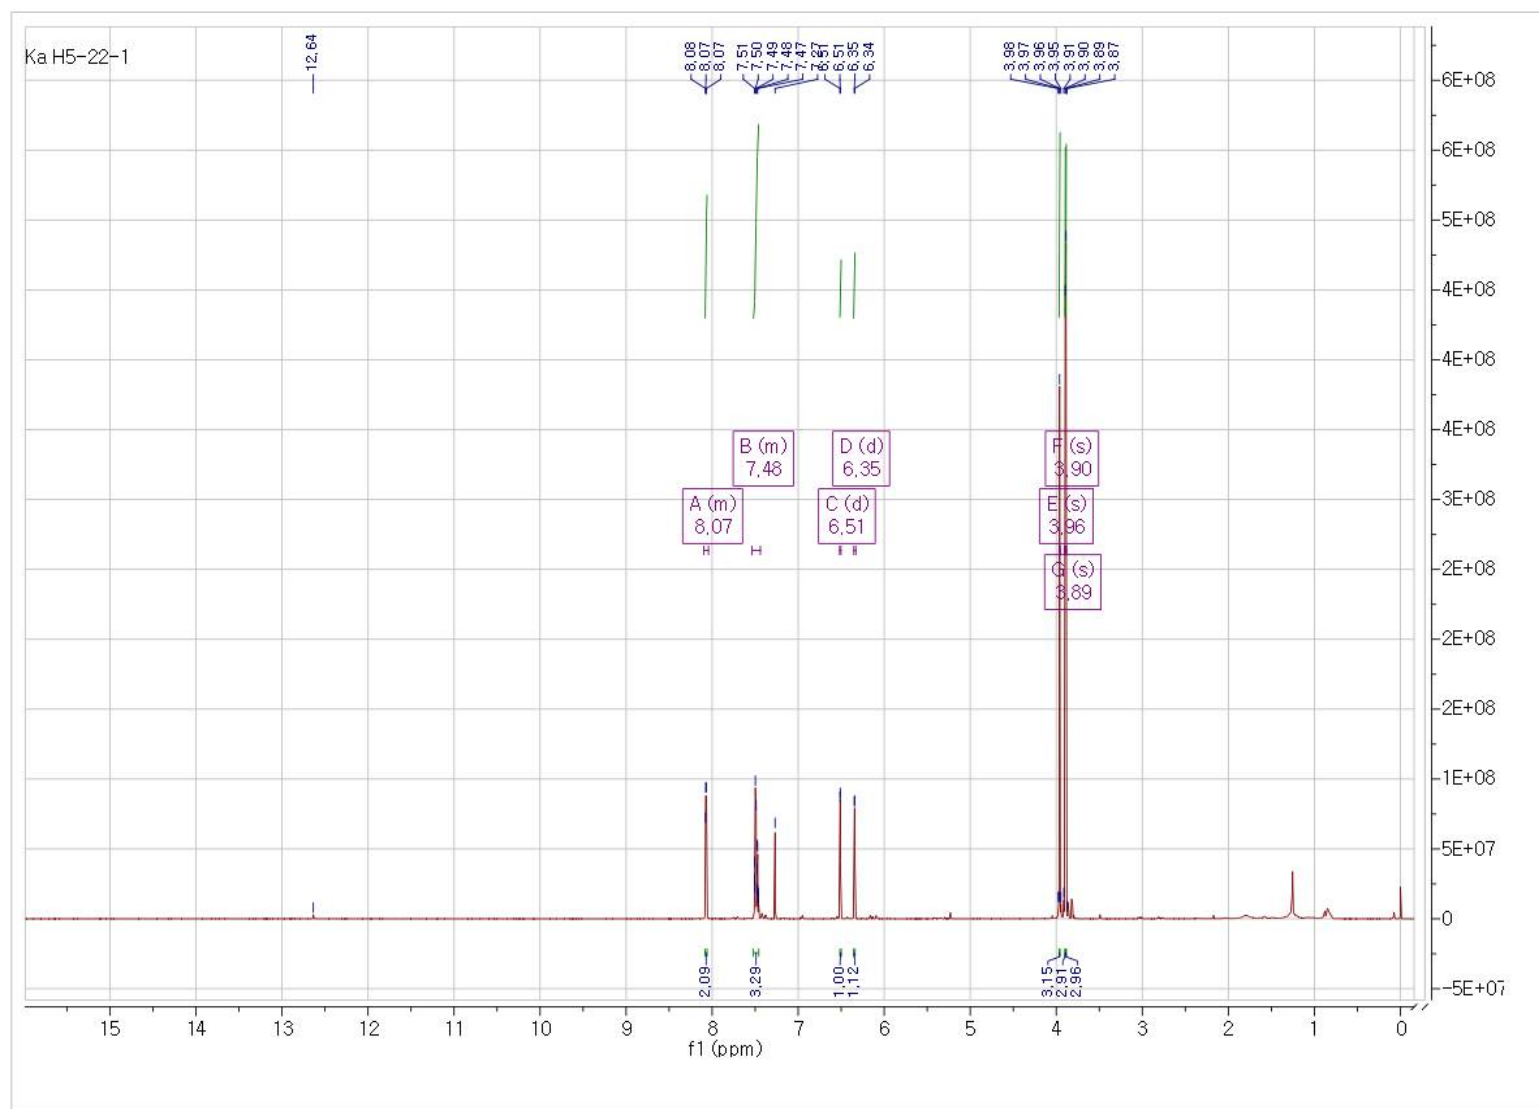

**Figure S6 :** <sup>1</sup>H-NMR spectrum of compound **6** (in CDCl<sub>3</sub>)
